# Supplementary material
Source: PubMed Central journal article supplement (PMC4109762)
Supplement: supp_M047738_jlr.M047738-1.pdf [file supp_M047738_jlr.M047738-1.pdf]

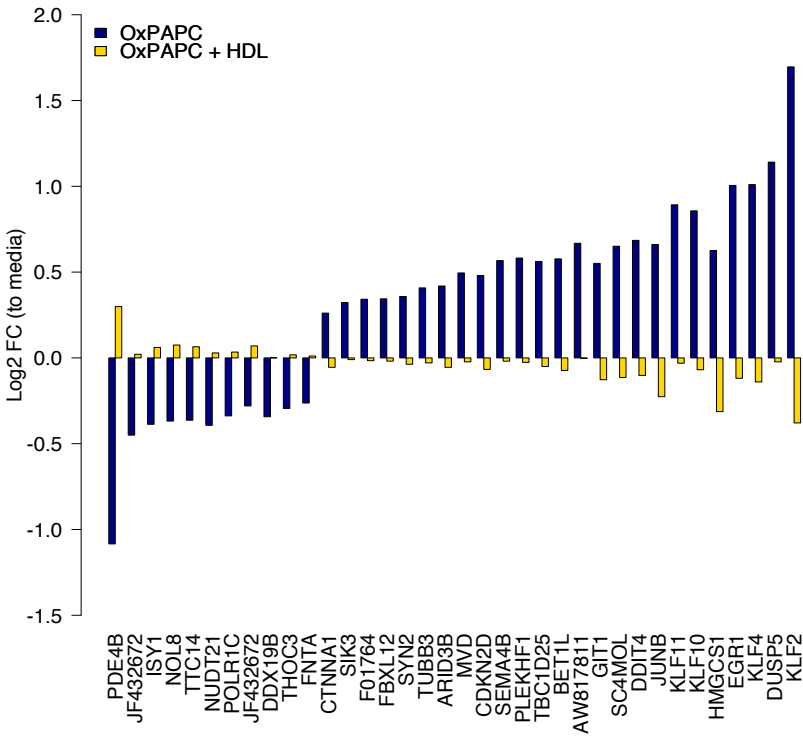

**Supplementary Figure I: OxPAPC regulated genes most affected by HDL include the KLF**

**family of transcription factors.** The expression of 36 genes were significantly affected by OxPAPC (blue) and completely reversed by HDL (yellow). KLF2 showed the largest response to HDL and the induction of several other KLF transcription factors by OxPAPC was similarly reversed by HDL co-treatment. Data are presented as average log2 fold change relative to media control treated samples.
