# Supplementary material
Source: PubMed Central journal article supplement (PMC4109762)
Supplement: supp_M047738_jlr.M047738-2.pdf [file supp_M047738_jlr.M047738-2.pdf]

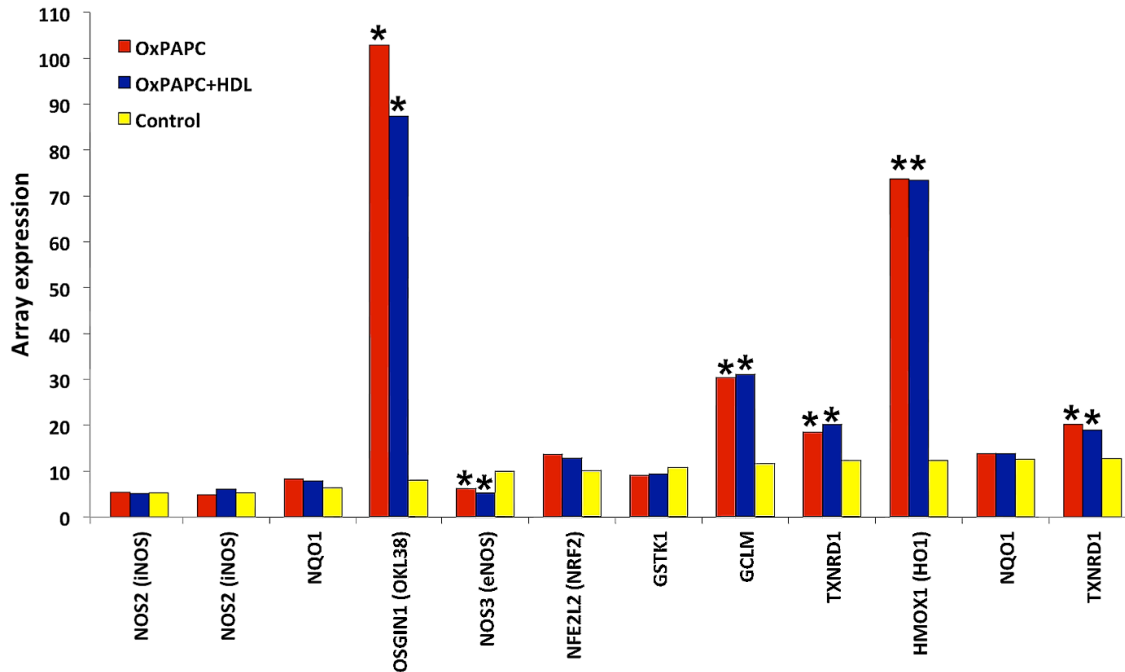

**Supplementary Figure II: Expression of 12 transcripts related to oxidative stress response.**

Presented are the effects of HDL and OxPAPC on the abundance of 12 transcripts encoded by 9 genes known to reflect or mediate oxidative stress responses. Significant changes (fdr adjusted p-value < 0.01) relative to media in samples treated with either OxPAPC or OxPAPC+HDL are indicated by an asterisk. The data suggest that HDL does not reverse OxPAPC mediated activation of oxidative stress response pathways. Data presented at the probe level, therefore genes that are detected by multiple probes appear multiple times.
