# Supplementary material
Source: PubMed Central journal article supplement (PMC4109762)
Supplement: supp_M047738_jlr.M047738-3.pdf [file supp_M047738_jlr.M047738-3.pdf]

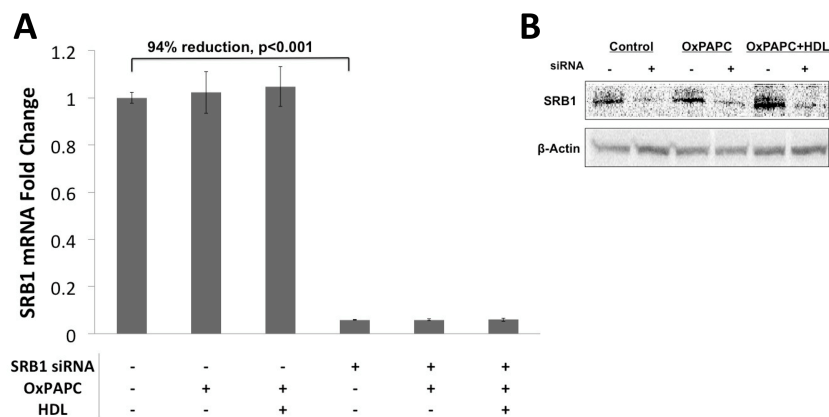

**Supplementary Figure III: siRNA transfection effectively suppressed SR-B1 mRNA and protein levels.** HAEC were transfected with either siRNA targeting SR-B1 or scramble control siRNA and treated 48 hours later with media, OxPAPC (50ug/ml), HDL (50ug/ml) or OxPAPC and HDL (50ug/ml) as described in the Methods. SR-B1 mRNA levels as determined by qPCR (**A**) and protein levels as determined by western blot (**B**) were significantly reduced in siRNA treated samples. Data is presented as average fold change of triplicate samples  $\pm$  SEM. P-values defined by unpaired Student's *t*-test.
