# Supplementary material
Source: PubMed Central journal article supplement (PMC4109762)
Supplement: supp_M047738_jlr.M047738-4.pdf [file supp_M047738_jlr.M047738-4.pdf]

**Supplementary Tables**

**Supplementary Table I: HDL reverses 50-60% of genes induced by OxPAPC in HAEC**

|                              |         | Number of genes affected by OxPAPC |      |     |     | Number of genes affected by OxPAPC + HDL |      |     |     | % of genes reversed by HDL |      |      |      |
|------------------------------|---------|------------------------------------|------|-----|-----|------------------------------------------|------|-----|-----|----------------------------|------|------|------|
|                              |         | 1 (any)                            | 1.3  | 1.5 | 2   | 1 (any)                                  | 1.3  | 1.5 | 2   | 1 (any)                    | 1.3  | 1.5  | 2    |
| Fold change cutoff ->        |         |                                    |      |     |     |                                          |      |     |     |                            |      |      |      |
| FDR corrected p-value cutoff | 1 (any) | 14878                              | 2209 | 936 | 240 | 14878                                    | 1571 | 503 | 103 | 0                          | 28.9 | 46.3 | 57.1 |
|                              | 0.1     | 2206                               | 1609 | 824 | 228 | 1106                                     | 836  | 376 | 96  | 49.86                      | 48   | 54.4 | 57.9 |
|                              | 0.05    | 1679                               | 1365 | 774 | 221 | 806                                      | 678  | 350 | 92  | 52                         | 50.3 | 54.8 | 58.4 |
|                              | 0.01    | 1004                               | 938  | 630 | 205 | 412                                      | 398  | 257 | 81  | 58.96                      | 57.6 | 59.2 | 60.5 |

Values indicate the number of genes passing different fold change and p-value cutoffs in OxPAPC and OxPAPC +HDL treated HAEC. Differences between the corresponding numbers are considered as the number of genes “reversed by HDL”.
