# Supplementary material
Source: PubMed Central journal article supplement (PMC4109762)
Supplement: supp_M047738_jlr.M047738-5.pdf [file supp_M047738_jlr.M047738-5.pdf]

**Supplementary Table II: HDL effect on OxPAPC co-expression modules**

|             | Number of genes in module (in Romanoski et al) | Number of genes in module assayed in this study | Number of genes significantly affected by OxPAPC | Number of genes reversed by HDL | Fraction of genes reversed by HDL | GO terms                                                                                                                                                                                                                                                                                                                                                | GO IDs                                                                                                                                                     |
|-------------|------------------------------------------------|-------------------------------------------------|--------------------------------------------------|---------------------------------|-----------------------------------|---------------------------------------------------------------------------------------------------------------------------------------------------------------------------------------------------------------------------------------------------------------------------------------------------------------------------------------------------------|------------------------------------------------------------------------------------------------------------------------------------------------------------|
| black       | 83                                             | 79                                              | 32                                               | 11                              | 34%                               | endocytosis                                                                                                                                                                                                                                                                                                                                             | GO:0006897                                                                                                                                                 |
| blue        | 255                                            | 236                                             | 126                                              | 48                              | 38%                               | sulfur amino acid metabolic process, glutamine family amino acid metabolic process, fat cell differentiation, positive regulation of protein polymerization                                                                                                                                                                                             | GO:0000096, GO:0009064, GO:0045444, GO:0032273                                                                                                             |
| brown       | 244                                            | 230                                             | 85                                               | 43                              | 50%                               | interspecies interaction between organisms, golgi organization                                                                                                                                                                                                                                                                                          | GO:0044419, GO:0007030                                                                                                                                     |
| green       | 174                                            | 161                                             | 65                                               | 21                              | 32%                               | membrane protein ectodomain proteolysis, regulation of actin filament polymerization                                                                                                                                                                                                                                                                    | GO:0006509, GO:0030833                                                                                                                                     |
| greenyellow | 33                                             | 31                                              | 10                                               | 7                               | 70%                               | cell migration                                                                                                                                                                                                                                                                                                                                          | GO:0016477                                                                                                                                                 |
| grey        | 53                                             | 46                                              | 6                                                | 2                               | 33%                               | -                                                                                                                                                                                                                                                                                                                                                       | -                                                                                                                                                          |
| magenta     | 74                                             | 71                                              | 28                                               | 12                              | 42%                               | negative regulation of cyclin-dependent protein kinase activity                                                                                                                                                                                                                                                                                         | GO:0045736                                                                                                                                                 |
| pink        | 76                                             | 72                                              | 33                                               | 10                              | 30%                               | embryonic morphogenesis                                                                                                                                                                                                                                                                                                                                 | GO:0048598                                                                                                                                                 |
| purple      | 45                                             | 43                                              | 25                                               | 5                               | 20%                               | protein folding, response to unfolded protein                                                                                                                                                                                                                                                                                                           | GO:0006457, GO:0006986                                                                                                                                     |
| red         | 130                                            | 119                                             | 50                                               | 22                              | 44%                               | elevation of cytosolic calcium ion concentration                                                                                                                                                                                                                                                                                                        | GO:0007204                                                                                                                                                 |
| turquoise   | 323                                            | 292                                             | 66                                               | 37                              | 56%                               | nucleobase, nucleoside, nucleotide and nucleic acid metabolic process, gene expression, ribosome biogenesis, spindle checkpoint, negative regulation of ubiquitin-protein ligase activity during mitotic cell cycle, DNA damage checkpoint, DNA unwinding during replication, mitotic cell cycle checkpoint, DNA repair, DNA-dependent, DNA replication | GO:0006139, GO:0010467, GO:0042254, GO:0031577, GO:0051436, GO:0000077, GO:0006268, GO:0007093, GO:0006281, GO:0006261, GO:0009262, GO:0006284, GO:0006298 |
| yellow      | 245                                            | 228                                             | 64                                               | 38                              | 59%                               | deoxyribonucleotide metabolic process, base-excision repair, mismatch repair                                                                                                                                                                                                                                                                            | GO:0007165, GO:0016070                                                                                                                                     |

The effect of HDL on genes that are part of the co-expression modules reported in Romanoski et al. Hub genes were determined as genes with k-within scaled >0.8.
