# Supplementary material
Source: PubMed Central journal article supplement (PMC4109762)
Supplement: supp_M047738_jlr.M047738-6.pdf [file supp_M047738_jlr.M047738-6.pdf]

**Supplementary Table III. Gene Ontology biological processes affected by OxPAPC, HDL and cholesterol-cyclodextrin.**

| GO_ID      | Biological process                          | Number of genes in pathway | Number of significantly affected genes by: |            |             | P value  |            |             |
|------------|---------------------------------------------|----------------------------|--------------------------------------------|------------|-------------|----------|------------|-------------|
|            |                                             |                            | OxPAPC                                     | OxPAPC+HDL | OxPAPC+CHOL | OxPAPC   | OxPAPC+HDL | OxPAPC+CHOL |
| GO:0007275 | multicellular organismal development        | 2523                       | 770                                        | NA         | NA          | 7.00E-08 | NS         | NS          |
| GO:0031349 | positive regulation of defense response     | 153                        | 69                                         | NA         | NA          | 4.40E-07 | NS         | NS          |
| GO:0048584 | positive regulation of response to stimu... | 721                        | 246                                        | NA         | NA          | 1.40E-06 | NS         | NS          |
| GO:0001933 | negative regulation of protein phosphory... | 145                        | 64                                         | NA         | NA          | 2.80E-06 | NS         | NS          |
| GO:0002237 | response to molecule of bacterial origin    | 142                        | 61                                         | NA         | NA          | 1.40E-05 | NS         | NS          |
| GO:0051240 | positive regulation of multicellular org... | 285                        | 107                                        | NA         | NA          | 2.10E-05 | NS         | NS          |
| GO:0045428 | regulation of nitric oxide biosynthetic ... | 28                         | 18                                         | NA         | NA          | 2.90E-05 | NS         | NS          |
| GO:0008063 | Toll signaling pathway                      | 66                         | 33                                         | NA         | NA          | 3.60E-05 | NS         | NS          |
| GO:0045088 | regulation of innate immune response        | 151                        | 61                                         | NA         | NA          | 0.00012  | NS         | NS          |
| GO:0051186 | cofactor metabolic process                  | 189                        | 73                                         | NA         | NA          | 0.00015  | NS         | NS          |
| GO:0045168 | cell-cell signaling involved in cell fat... | 20                         | 13                                         | NA         | NA          | 0.00034  | NS         | NS          |
| GO:0051301 | cell division                               | 381                        | 130                                        | NA         | NA          | 0.00045  | NS         | NS          |
| GO:0006606 | protein import into nucleus                 | 146                        | 50                                         | NA         | 56          | 0.02204  | NS         | NS          |
| GO:0006461 | protein complex assembly                    | 572                        | 170                                        | 95         | NA          | 0.03957  | NS         | NS          |
| GO:0032446 | protein modification by small protein co... | 490                        | 146                                        | NA         | NA          | 0.04951  | NS         | NS          |
| GO:0031326 | regulation of cellular biosynthetic proc... | 2356                       | 741                                        | NA         | 826         | 3.30E-10 | NS         | 8.50E-12    |
| GO:0009889 | regulation of biosynthetic process          | 2377                       | 744                                        | NA         | 834         | 8.40E-10 | NS         | 5.20E-12    |
| GO:2000112 | regulation of cellular macromolecule bio... | 2227                       | 701                                        | NA         | 779         | 1.10E-09 | NS         | 8.10E-11    |
| GO:0010556 | regulation of macromolecule biosynthetic... | 2262                       | 710                                        | NA         | 796         | 1.40E-09 | NS         | 1.00E-11    |
| GO:0001944 | vasculature development                     | 358                        | 146                                        | NA         | 157         | 1.40E-09 | NS         | 2.80E-09    |
| GO:0001568 | blood vessel development                    | 341                        | 139                                        | NA         | 149         | 3.70E-09 | NS         | 9.70E-09    |
| GO:0048514 | blood vessel morphogenesis                  | 299                        | 121                                        | NA         | 131         | 6.30E-08 | NS         | 6.30E-08    |
| GO:0042429 | cellular biosynthetic process               | 3571                       | 1053                                       | NA         | 1169        | 2.00E-07 | NS         | 5.00E-08    |
| GO:0007049 | cell cycle                                  | 1137                       | 373                                        | NA         | 408         | 2.60E-07 | NS         | 3.90E-07    |
| GO:0010558 | negative regulation of macromolecule bio... | 652                        | 229                                        | NA         | 252         | 2.80E-07 | NS         | 1.20E-07    |
| GO:2000113 | negative regulation of cellular macromol... | 633                        | 223                                        | NA         | 244         | 3.10E-07 | NS         | 2.50E-07    |
| GO:0051145 | smooth muscle cell differentiation          | 22                         | 17                                         | NA         | 17          | 9.30E-07 | NS         | 4.80E-06    |
| GO:0001816 | cytokine production                         | 263                        | 105                                        | NA         | 108         | 1.00E-06 | NS         | 3.10E-05    |
| GO:0042326 | negative regulation of phosphorylation      | 155                        | 68                                         | NA         | 72          | 1.80E-06 | NS         | 5.00E-06    |
| GO:0010563 | negative regulation of phosphorus metabo... | 160                        | 69                                         | NA         | 73          | 3.20E-06 | NS         | 9.50E-06    |
| GO:0045936 | negative regulation of phosphate metabol... | 160                        | 69                                         | NA         | 73          | 3.20E-06 | NS         | 9.50E-06    |
| GO:0035295 | tube development                            | 257                        | 101                                        | NA         | 110         | 3.70E-06 | NS         | 2.80E-06    |
| GO:0006809 | nitric oxide biosynthetic process           | 35                         | 22                                         | NA         | 21          | 6.50E-06 | NS         | 0.00016     |
| GO:0045089 | positive regulation of innate immune res... | 115                        | 51                                         | NA         | 50          | 2.40E-05 | NS         | 0.00091     |
| GO:0022402 | cell cycle process                          | 863                        | 277                                        | NA         | 303         | 6.70E-05 | NS         | 9.90E-05    |
| GO:0048729 | tissue morphogenesis                        | 268                        | 114                                        | 72         | NA          | 5.70E-09 | 1.40E-07   | NS          |
| GO:0009966 | regulation of signal transduction           | 1200                       | 395                                        | 248        | NA          | 7.00E-08 | 2.30E-09   | NS          |
| GO:0009790 | embryo development                          | 561                        | 204                                        | 131        | NA          | 7.20E-08 | 1.90E-08   | NS          |
| GO:0048583 | regulation of response to stimulus          | 1542                       | 489                                        | 312        | NA          | 3.30E-07 | 1.30E-10   | NS          |
| GO:0051246 | regulation of protein metabolic process     | 1020                       | 335                                        | 205        | NA          | 1.00E-06 | 6.60E-07   | NS          |
| GO:0031399 | regulation of protein modification proce... | 730                        | 243                                        | 155        | NA          | 1.30E-05 | 6.60E-07   | NS          |
| GO:0001775 | cell activation                             | 494                        | 168                                        | 110        | NA          | 8.60E-05 | 3.20E-06   | NS          |
| GO:0048519 | negative regulation of biological proces... | 2180                       | 727                                        | 421        | 804         | 3.30E-16 | 2.70E-11   | 1.40E-17    |
| GO:0048523 | negative regulation of cellular process     | 2010                       | 668                                        | 392        | 746         | 2.40E-14 | 4.60E-11   | 6.50E-17    |
| GO:0050794 | regulation of cellular process              | 5391                       | 1576                                       | 915        | 1736        | 5.30E-12 | 7.70E-12   | 3.40E-11    |
| GO:0031323 | regulation of cellular metabolic process    | 3161                       | 974                                        | 583        | 1077        | 1.70E-11 | 2.40E-12   | 4.50E-12    |
| GO:0019222 | regulation of metabolic process             | 3464                       | 1055                                       | 625        | 1164        | 3.40E-11 | 1.80E-11   | 2.50E-11    |
| GO:0060255 | regulation of macromolecule metabolic pr... | 2983                       | 916                                        | 535        | 1006        | 2.90E-10 | 5.60E-09   | 7.40E-10    |
| GO:0050789 | regulation of biological process            | 5652                       | 1630                                       | 943        | 1797        | 3.90E-10 | 3.00E-10   | 2.30E-09    |
| GO:0072359 | circulatory system development              | 515                        | 198                                        | 127        | 215         | 6.90E-10 | 9.00E-10   | 7.10E-10    |
| GO:0072358 | cardiovascular system development           | 515                        | 198                                        | 127        | 215         | 6.90E-10 | 9.00E-10   | 7.10E-10    |
| GO:0080090 | regulation of primary metabolic process     | 3086                       | 940                                        | 558        | 1038        | 1.10E-09 | 4.50E-10   | 6.40E-10    |
| GO:0048518 | positive regulation of biological proces... | 2428                       | 756                                        | 464        | 834         | 1.70E-09 | 7.70E-12   | 9.80E-10    |
| GO:0065007 | biological regulation                       | 5949                       | 1702                                       | 991        | 1876        | 1.70E-09 | 3.70E-11   | 1.50E-08    |
| GO:0035556 | intracellular signal transduction           | 1342                       | 446                                        | 277        | 494         | 1.90E-09 | 2.30E-10   | 2.60E-10    |
| GO:0051239 | regulation of multicellular organismal p... | 1088                       | 371                                        | 230        | 399         | 2.10E-09 | 1.20E-09   | 3.30E-08    |
| GO:0010468 | regulation of gene expression               | 2378                       | 739                                        | 423        | 817         | 4.40E-09 | 1.70E-06   | 1.50E-09    |
| GO:0066351 | transcription, DNA-dependent                | 2233                       | 698                                        | 402        | 781         | 4.90E-09 | 9.20E-07   | 7.80E-11    |
| GO:0051716 | cellular response to stimulus               | 3431                       | 1029                                       | 621        | 1123        | 5.20E-09 | 1.20E-11   | 1.30E-07    |
| GO:0048522 | positive regulation of cellular process     | 2235                       | 697                                        | 436        | 779         | 8.00E-09 | 1.80E-12   | 1.90E-10    |
| GO:0008283 | cell proliferation                          | 1016                       | 346                                        | 217        | 376         | 9.50E-09 | 1.50E-09   | 2.70E-08    |
| GO:0010605 | negative regulation of macromolecule met... | 965                        | 330                                        | 196        | 363         | 1.30E-08 | 5.60E-07   | 5.90E-09    |
| GO:0050896 | response to stimulus                        | 4402                       | 1286                                       | 774        | 1408        | 1.90E-08 | 1.30E-12   | 4.70E-07    |
| GO:0042127 | regulation of cell proliferation            | 752                        | 265                                        | 173        | 298         | 2.10E-08 | 2.70E-10   | 3.40E-10    |
| GO:0010629 | negative regulation of gene expression      | 628                        | 226                                        | 136        | 251         | 3.70E-08 | 1.10E-06   | 3.80E-09    |
| GO:0048646 | anatomical structure formation involved ... | 528                        | 195                                        | 123        | 214         | 3.80E-08 | 6.10E-08   | 1.50E-08    |
| GO:0006928 | cellular component movement                 | 764                        | 267                                        | 158        | 294         | 4.40E-08 | 2.70E-06   | 1.60E-08    |
| GO:0065009 | regulation of molecular function            | 1337                       | 434                                        | 267        | 468         | 9.10E-08 | 1.60E-08   | 1.40E-06    |
| GO:0050793 | regulation of developmental process         | 917                        | 310                                        | 202        | 351         | 1.40E-07 | 4.00E-10   | 1.10E-09    |
| GO:0009892 | negative regulation of metabolic process    | 1029                       | 343                                        | 208        | 382         | 1.40E-07 | 3.40E-07   | 1.40E-08    |
| GO:0032502 | developmental process                       | 2845                       | 856                                        | 516        | 948         | 1.50E-07 | 2.20E-09   | 6.00E-08    |
| GO:0060429 | epithelium development                      | 337                        | 132                                        | 89         | 142         | 1.50E-07 | 1.10E-08   | 3.20E-07    |
| GO:0008219 | cell death                                  | 1283                       | 417                                        | 250        | 451         | 1.50E-07 | 4.70E-07   | 1.30E-06    |
| GO:0016265 | death                                       | 1284                       | 417                                        | 250        | 451         | 1.60E-07 | 5.00E-07   | 1.40E-06    |
| GO:0045595 | regulation of cell differentiation          | 633                        | 224                                        | 148        | 242         | 2.00E-07 | 1.90E-09   | 6.10E-07    |
| GO:0019220 | regulation of phosphate metabolic proces... | 666                        | 233                                        | 151        | 250         | 3.10E-07 | 1.20E-08   | 2.10E-06    |
| GO:0009058 | biosynthetic process                        | 3661                       | 1074                                       | 621        | 1200        | 4.60E-07 | 1.70E-06   | 1.90E-08    |
| GO:0007154 | cell communication                          | 3164                       | 939                                        | 564        | 1020        | 4.70E-07 | 4.10E-09   | 1.90E-05    |
| GO:0001709 | cell fate determination                     | 20                         | 16                                         | 14         | 15          | 8.70E-07 | 3.60E-08   | 3.30E-05    |
| GO:0031324 | negative regulation of cellular metaboli... | 947                        | 314                                        | 190        | 348         | 9.20E-07 | 2.00E-06   | 2.20E-07    |
| GO:0051674 | localization of cell                        | 589                        | 207                                        | 131        | 227         | 1.00E-06 | 3.80E-07   | 6.80E-07    |
| GO:0009890 | negative regulation of biosynthetic proc... | 699                        | 240                                        | 148        | 266         | 1.10E-06 | 1.40E-06   | 2.60E-07    |
| GO:0031327 | negative regulation of cellular biosynth... | 686                        | 236                                        | 145        | 261         | 1.20E-06 | 2.00E-06   | 3.40E-07    |
| GO:0006468 | protein phosphorylation                     | 835                        | 280                                        | 178        | 304         | 1.30E-06 | 6.50E-08   | 3.60E-06    |
| GO:0051253 | negative regulation of RNA metabolic pro... | 582                        | 204                                        | 123        | 223         | 1.50E-06 | 1.30E-05   | 1.40E-06    |
| GO:0044237 | cellular metabolic process                  | 6286                       | 1762                                       | 997        | 1955        | 1.80E-06 | 2.90E-05   | 1.20E-06    |
| GO:0023052 | signaling                                   | 908                        | 908                                        | 547        | 988         | 3.00E-06 | 1.50E-08   | 6.70E-05    |
| GO:0040011 | locomotion                                  | 806                        | 269                                        | 165        | 294         | 3.40E-06 | 3.00E-06   | 4.40E-06    |
| GO:0009893 | positive regulation of metabolic process    | 1397                       | 439                                        | 289        | 487         | 4.60E-06 | 6.30E-11   | 1.40E-06    |
| GO:0032501 | multicellular organismal process            | 3399                       | 993                                        | 588        | 1088        | 4.70E-06 | 2.20E-07   | 3.30E-05    |
| GO:0048869 | cellular developmental process              | 1781                       | 547                                        | 337        | 607         | 5.30E-06 | 6.50E-08   | 1.70E-06    |
| GO:0051270 | regulation of cellular component movemen... | 304                        | 115                                        | 76         | 127         | 7.00E-06 | 1.40E-06   | 2.30E-06    |
| GO:0046209 | nitric oxide metabolic process              | 45                         | 26                                         | 19         | 25          | 8.70E-06 | 7.60E-06   | 0.00022     |
| GO:0008152 | metabolic process                           | 6791                       | 1883                                       | 1060       | 2085        | 1.50E-05 | 0.00027    | 3.30E-05    |
| GO:0040012 | regulation of locomotion                    | 300                        | 112                                        | 77         | 123         | 1.80E-05 | 3.90E-07   | 9.80E-06    |
| GO:0009987 | cellular process                            | 8990                       | 2432                                       | 1364       | 2706        | 2.30E-05 | 0.00022    | 7.40E-06    |

All biological processes significantly ( $p < 0.05$ ) affected by OxPAPC are presented. Enrichment analysis was performed using TopGO R package. Background color indicates reversal by HDL or by cholesterol. NA and NS indicate lack of significant enrichment of indicated pathways. Processes reversed both by HDL and cholesterol are in green, processes reversed by HDL only are in blue, processes reversed by cholesterol only are in grey and processes not reversed by either HDL or cholesterol are in red.
